# Supplementary material for: The typically developing paediatric foot: how flat should it be? A systematic review
Source: J Foot Ankle Res. 2017 Aug 15;10:37. doi: 10.1186/s13047-017-0218-1 (PMC5558233; doi:10.1186/s13047-017-0218-1)
Supplement: Supplementary file 2 — Epidemiological Appraisal Instrument. (XLSX 16 kb) [file 13047_2017_218_MOESM2_ESM.xlsx]

## Sheet: Sheet1
			1. Hypothesis/aim/objective	2.Exposure	3. Outcome	4. Study design	5.Study population	6. Inclusion criteria clearly described	7.Participation rates reported	8.Characteristics of participants described	9.Characteristics of subjects lost or unavailable reported	13.Statistical methods described	14.Results clearly described	15.Variability in data reported	16.Statistical parameters reported	17. Sample size calculation	18.Comparability of groups	19. Adequate participation rate	21.Drop-out characteristics reported	23.Subjects randomised to groups	24.Concealed randomisation	25.Exposure variables reliable	26.Exposure variables valid	27.Exposure methods comparable	29.Observers blind to suject grouping	30.Subjects blinded	31.Outcome measures reliable	32.Outcome measures valid	33.Standardised assessment of variables	34.Same time period of observations	42.Generalisability of results to study population	43.Generalisability of results to greater population	Overall quality score (range 0-2)
		Bertsch 2004	y	y	y	y	p	p	n	y	y	y	y	y	n	n	na	utd	y	na	na	utd	utd	na	na	na	utd	utd	y	y	utd	utd	1.08333
		Bosch 2007	y	y	y	y	p	y	n	y	n	y	y	y	n	n	na	utd	n	na	na	utd	utd	na	na	na	utd	utd	y	y	utd	utd	0.958333
		Chang 2012	y	y	y	y	p	y	n	y	na	y	y	y	n	n	na	utd	na	na	na	y	utd	na	na	na	y	utd	na	na	utd	utd	1.15
		Delgado 2014	y	y	y	y	p	y	n	y	na	y	p	p	n	n	na	utd	na	na	na	y	utd	na	na	na	y	utd	na	na	utd	utd	1.05
		Didia 1987	y	y	y	y	p	p	n	y	na	y	y	y	n	n	na	utd	na	na	na	utd	utd	na	na	na	utd	utd	na	na	utd	utd	1.8
		Dowling 2004	y	y	y	y	n	y	n	n	na	y	y	y	n	n	na	utd	na	na	na	y	utd	na	na	na	y	utd	na	na	utd	utd	1
		El 2006	y	y	y	y	p	n	n	y	na	y	y	y	n	n	y	utd	na	n	n	utd	utd	y	n	n	utd	utd	y	y	utd	utd	0.892857
		Evans 2011	y	y	y	y	p	y	n	y	na	y	y	y	y	n	na	utd	na	na	na	y	utd	na	na	na	y	utd	na	na	utd	utd	1.25
		Evans 2015	y	y	y	y	p	n	n	n	na	y	y	y	n	n	na	utd	na	na	na	y	p	na	na	na	y	p	na	n	utd	utd	1
		Forriol 1990	y	y	y	y	p	n	n	n	na	n	y	y	n	n	na	utd	na	na	na	utd	utd	na	na	na	utd	utd	na	na	utd	utd	0.65
		Gijon-noguren 2016	y	y	y	y	y	y	n	y	na	y	y	y	n	n	na	utd	na	na	na	y	utd	na	na	na	y	utd	y	na	utd	utd	1.2381
		Gill 2016	y	y	y	y	p	n	n	y	na	y	y	y	n	n	na	utd	na	na	na	utd	utd	na	na	na	utd	utd	y	na	utd	utd	0.904762
		Gilmour 2001	y	y	y	y	p	y	n	y	na	p	y	y	n	n	na	utd	na	na	na	utd	utd	na	na	na	utd	utd	na	na	utd	utd	0.9
		Hallemans 2013	y	y	y	y	n	p	n	y	n	y	y	y	n	n	na	utd	n	na	na	n	utd	na	na	na	n	utd	y	y	utd	utd	0.875
		Hawke 2016	y	y	y	y	p	p	n	y	na	y	y	y	n	n	na	utd	na	na	na	utd	utd	na	na	na	y	utd	y	na	utd	utd	1.04762
		Igbigbi 2002	y	y	y	y	p	y	n	n	na	y	y	y	n	n	na	utd	na	na	na	y	utd	na	na	na	y	utd	na	na	utd	utd	1.05
		Igbigbi 2005	y	y	y	y	p	y	n	n	na	y	y	y	n	n	utd	utd	na	n	n	y	utd	y	n	n	y	utd	y	utd	utd	utd	0.892857
		Jankowicz 2015	y	y	y	y	p	y	n	p	n	n	y	y	n	n	na	utd	n	na	na	utd	utd	na	na	na	utd	utd	y	y	utd	utd	0.833333
		Mauch 2008	y	y	y	y	p	y	n	y	na	y	y	y	n	n	y	utd	na	n	n	y	utd	y	n	n	y	utd	y	utd	utd	utd	1.03571
		Mikolajczyk 2010	y	p	p	y	p	n	n	n	na	p	p	p	n	n	na	utd	na	na	na	utd	utd	na	na	na	utd	utd	na	na	utd	utd	1
		Morita 2015	y	y	y	y	p	p	n	y	na	y	p	n	n	n	na	utd	na	na	na	utd	utd	na	na	na	utd	utd	utd	na	utd	utd	0.714286
		Morrison 2007	y	y	y	y	p	n	n	y	na	y	y	y	n	n	na	utd	na	na	na	y	utd	na	na	na	utd	utd	na	na	utd	utd	0.95
		Muller 2012	y	y	y	y	p	y	n	y	na	y	y	y	n	n	na	utd	na	na	na	utd	utd	na	na	na	utd	utd	na	n	utd	utd	0.904762
		Nikolaidou 2006	y	y	y	y	p	y	n	y	na	y	y	y	n	n	na	utd	na	na	na	p	utd	na	na	na	p	utd	na	na	utd	utd	1.05
		Pfeiffer 2006	y	y	y	y	p	y	n	y	na	y	y	y	n	n	na	utd	na	na	na	utd	utd	na	na	na	utd	utd	na	utd	utd	utd	0.904762
		Pinto 2011	y	y	y	y	p	y	n	y	na	y	y	y	n	n	na	utd	na	na	na	utd	utd	na	na	na	utd	utd	na	utd	utd	utd	0.9
		Redmond 2008	y	y	y	y	p	n	n	n	na	y	y	y	n	n	na	utd	na	na	na	utd	y	na	na	na	utd	y	y	n	utd	utd	0.954545
		Sacco 2015	y	y	y	y	p	n	n	y	na	y	y	y	n	y	y	y	na	n	n	utd	utd	y	n	n	utd	utd	y	utd	y	utd	1.03571
		Sadeghi 2015	y	y	y	y	p	y	n	y	na	y	y	y	n	y	na	y	na	na	na	utd	utd	na	na	na	utd	utd	na	na	y	utd	1.25
		Sobel 1999	y	y	y	y	p	y	n	y	na	y	y	y	n	n	na	utd	na	na	na	p	utd	na	na	na	p	utd	na	na	utd	utd	1.05
		Tong 2016	y	y	y	y	p	p	n	y	na	y	y	y	n	n	na	utd	na	na	na	utd	utd	na	na	na	utd	utd	y	na	utd	utd	0.952381
		Tudor 2009	y	y	y	y	p	y	n	y	na	y	y	y	n	n	na	utd	na	na	na	utd	utd	na	na	na	utd	utd	na	na	utd	utd	0.95
		Unger 2004	y	y	y	y	n	n	n	n	y	p	y	y	n	n	na	utd	y	na	na	utd	utd	na	na	na	utd	utd	y	y	utd	utd	0.791667
		Villarroya 2008	y	y	y	y	y	n	y	y	na	y	y	y	n	n	y	y	na	n	n	utd	utd	y	n	n	utd	utd	y	utd	utd	utd	0.965517
		Waseda 2014	n	y	y	y	p	n	n	n	na	y	y	y	n	n	na	utd	na	na	na	y	y	na	na	na	y	y	na	utd	utd	utd	0.954545
		Studies scoring 'Yes' (%)	68	69	69	70	34	42	2	51	4	63	67	66	2	4	8	6	4	0	0	24	5	10	0	0	24	5	30	12	4	0
